# Supplementary material for: A coarse-grained molecular model of amyloid fibrils systems
Source: Royal Society of Chemistry journal article supplement (doi:10.1039/d3sm00408b), 2023-01-01
Supplement: d3sm00408b1.pdf [file d3sm00408b1.pdf]

# Coarse-Grained Molecular Model of Amyloid Fibrils Systems

## Supplementary Information

Authors: Shaden M. Daghash<sup>‡a</sup>, Oscar M. Matus Rivas<sup>‡a</sup>, Raffaele Mezzenga<sup>bc</sup> and Alejandro D. Rey<sup>\*a</sup>

- a. Department of Chemical Engineering, McGill University, 3610 University Street, Montréal, QC H3A 0C5, Canada. Email: [alejandro.rey@mcgill.ca](mailto:alejandro.rey@mcgill.ca)
- b. Department of Health Sciences and Technology, ETH Zürich, 8092 Zürich, Switzerland.
- c. Department of Materials, ETH Zürich, 8093 Zürich, Switzerland.

‡ These authors contributed equally to this work.

## Amyloid fibril geometry and interactions

Our filament model (Figure S.1) consists of a twisting ribbon formed by two filaments of backbone beads that are bonded horizontally ( $r_0 = 1.000$ ) and vertically ( $r_0=1.004$ ). These values of  $r_0$  arise naturally from the helicoidal geometry of the stranded fibril model. Similarly, bond bending parameters arise naturally from the geometry of the bi-stranded fibril model, which follows the equation of a helix. The intrinsic geometry of the model leads to the emergence of different  $\theta_0$  angles for backbone (bb) and interactive (ib) particles.

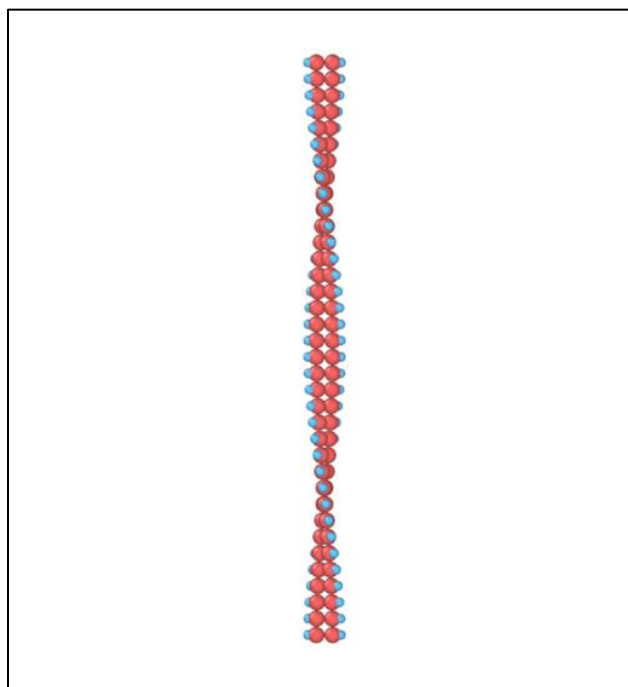

*Figure S. 1: Coarse-grained d1 model representation of a two-filament twisting ribbon amyloid fibril.*

The backbone (bb) and interactive (ib) particles serve different roles in our model. On one hand, the backbone (bb) particles model excluded volume interactions (short range repulsion) while the interactive (ib) particles represent the long-range electrostatic repulsion of amyloid fibrils in aqueous solution. For this reason, interactive (ib) particles are placed on the outer surface of backbone (bb) particles of the bi-stranded filament.

At this first stage of our model development, the short and long-range interactions are treated separately, thus a non-bonded interaction potential between interactive (ib) and backbone (bb) particles is not needed. However, bonded interactions between interactive (ib) and backbone (bb) particles are considered to maintain the geometry or bi-stranded structure of the filament.

## Phase diagrams of the s1, s4, and d4 models

The phase diagrams of the other test models used in this work (s1, s4, d4) are presented in Figure S.2. The different liquid crystalline phases are colored from a qualitative perspective only to differentiate the different phases.

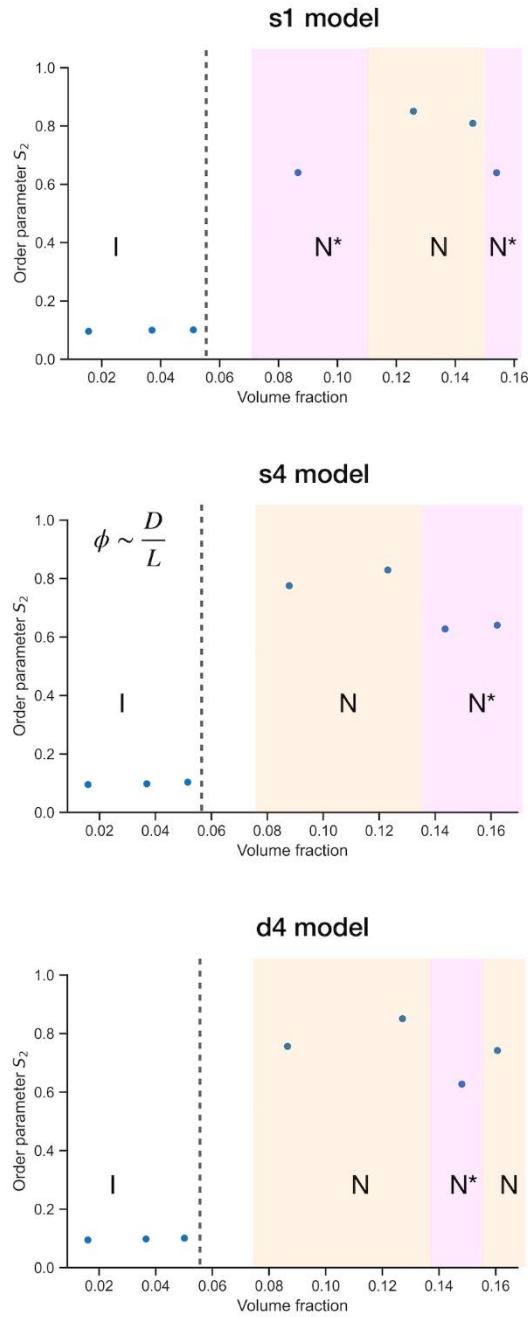

Figure S. 2: Phase diagrams of the s1, s4, and d4 models. Colors are used for qualitative differentiation of the different liquid crystalline phases.
